# Supplementary material
Source: PubMed Central journal article supplement (PMC4854206)
Supplement: NIHMS780780-supplement-Woodson_Chory.pdf [file NIHMS780780-supplement-Woodson_Chory.pdf]

S1 | A list of characterized genes encoding pentatricopeptide repeat-containing proteins. The genes are arranged according to the kingdom to which the organism belongs and then listed alphabetically.

| PPR protein-encoding gene             | Organism                                              | Localization (Predicted, Confirmed)/ target RNA (Predicted, <i>in vivo</i> association, <i>in vitro</i> confirmation)    | Possible function or involvement                                                                             | Loss of function phenotype                                                                                                                                                                                                      | Reference | Notes                                                                                         |
|---------------------------------------|-------------------------------------------------------|--------------------------------------------------------------------------------------------------------------------------|--------------------------------------------------------------------------------------------------------------|---------------------------------------------------------------------------------------------------------------------------------------------------------------------------------------------------------------------------------|-----------|-----------------------------------------------------------------------------------------------|
| <i>Plants</i>                         |                                                       |                                                                                                                          |                                                                                                              |                                                                                                                                                                                                                                 |           |                                                                                               |
| <i>CRP1</i>                           | Maize                                                 | Chloroplast stroma (C)<br><i>/psaC</i> 5' UTR ( <i>in vivo</i> ), <i>petA</i> 5' UTR ( <i>in vivo</i> ), <i>petD</i> (P) | Translation of <i>petA</i> , <i>psaC</i> mRNA, processing of <i>petD</i> mRNA                                | Reduced cytochrome <i>f</i> ( <i>petA</i> ) and photosystem I subunit ( <i>psaC</i> ) protein, unprocessed polycistronic <i>petD</i> mRNA, loss of cytochrome <i>b<sub>6</sub>f</i> complex, decrease of photosystem I activity | 1-3       | Associated with multisubunit protein complexes                                                |
| <i>CRR2</i><br>( <i>At3g46790</i> )   | <i>Arabidopsis</i>                                    | Chloroplast (P)<br><i>/rps7-ndhB</i> pre-mRNA (P)                                                                        | Controls <i>ndhB</i> expression by regulating intragenic processing of <i>rps7-ndhB</i> transcript           | Decreased NdhB protein levels, reduced chloroplast NA(P)DH dehydrogenase complex activity                                                                                                                                       | 4         |                                                                                               |
| <i>CRR4</i><br>( <i>At2g45350</i> )   | <i>Arabidopsis</i>                                    | Chloroplast (C)<br><i>/ndhH</i> ( <i>in vitro</i> )                                                                      | Binds <i>ndhD</i> mRNA to recruit RNA editing machinery                                                      | Reduced NdhH protein, reduced chloroplast NA(P)DH dehydrogenase complex activity                                                                                                                                                | 5,6       |                                                                                               |
| <i>EMP4</i>                           | Maize                                                 | Mitochondria (C)<br>/unknown                                                                                             | Mitochondria development, seed development                                                                   | Lethal loss of endosperm development in seeds, reduced levels of mitochondrial <i>rps2A/rp2B</i> , <i>rps3/rpl13</i> , <i>mttb</i> RNAs                                                                                         | 7         |                                                                                               |
| <i>Grp23</i><br>( <i>At1g10270</i> )  | <i>Arabidopsis</i>                                    | Nucleus (C)<br>/RNA polymerase II, subunit III ( <i>in vivo</i> )                                                        | Transcriptionally regulates early embryo development through interactions with RNA polymerase II             | Loss of proper embryonic development                                                                                                                                                                                            | 8         |                                                                                               |
| <i>GUN1</i><br>( <i>At2g31400</i> )   | <i>Arabidopsis</i>                                    | Chloroplast (C)<br>/unknown                                                                                              | Chloroplast development, Retrograde signaling                                                                | <i>gun</i> mutant, does not repress photosynthesis-related nuclear genes after chloroplast photo-oxidative damage or translation inhibition                                                                                     | 9         |                                                                                               |
| <i>HCF152</i><br>( <i>At3g09650</i> ) | <i>Arabidopsis</i>                                    | Chloroplast stroma (C)<br><i>/petB</i> pre-mRNA( <i>in vitro</i> )                                                       | Controls processing of <i>psbB-psbT-psbH-petB-petD</i> polycistronic RNA                                     | Impaired <i>petB</i> intron splicing/stabilization, impaired endonucleolytic cleavage of <i>psbH-petB</i> mRNA transcript, reduced cytochrome <i>b<sub>6</sub>f</i> complex activity                                            | 10-12     |                                                                                               |
| <i>LOI1</i><br>( <i>At4g14850</i> )   | <i>Arabidopsis</i>                                    | Mitochondria (P)<br>/unknown                                                                                             | Post-transcriptionally regulates 3-hydroxy-3-methylglutaryl coenzyme A reductase and isoprenoid biosynthesis | Insensitive to isoprenoid biosynthesis inhibitors lovastatin and clomazone                                                                                                                                                      | 13        | Binds single stranded nucleic acids <i>in vitro</i>                                           |
| <i>MCA1</i>                           | <i>Chlamydomonas reinhardtii</i> , (eukaryotic algae) | Chloroplast (C)<br><i>/petA</i> (P)                                                                                      | Regulates <i>petA</i> mRNA transcript stability                                                              | Reduced levels of <i>petA</i> mRNA transcript, reduced levels of cytochrome <i>f</i> ( <i>petA</i> ) protein, reduced activity of cytochrome <i>b<sub>6</sub>f</i> complex                                                      | 14,15     | MCA1 is a short-lived protein, abundance fluctuates rapidly under different growth conditions |
| <i>OTP3</i><br>( <i>At1g74910</i> )   | <i>Arabidopsis</i>                                    | Mitochondria (P)<br><i>/nad1</i> ( <i>in vivo</i> )                                                                      | Required for <i>trans</i> -splicing of intron 1 of <i>nad1</i> mRNA                                          | Reduced levels of Complex I activity. Defects in seed development and germination                                                                                                                                               | 16        |                                                                                               |
| <i>PGR3</i><br>( <i>At4g31850</i> )   | <i>Arabidopsis</i>                                    | Chloroplast (P)<br><i>/petL</i> (P), <i>ndhD</i> (P)                                                                     | Regulates stabilization/translation of <i>petL</i> mRNA and translation of <i>ndhD</i> mRNA                  | Reduced <i>petL</i> , <i>petG</i> mRNA, reduced NdhD protein, reduced level of cytochrome <i>b<sub>6</sub>f</i> and NA(P)DH dehydrogenase complex activities                                                                    | 17        |                                                                                               |

|                                             |                                                       |                                                                                            |                                                                                                                                                                                |                                                                                                                                          |       |                                                                               |
|---------------------------------------------|-------------------------------------------------------|--------------------------------------------------------------------------------------------|--------------------------------------------------------------------------------------------------------------------------------------------------------------------------------|------------------------------------------------------------------------------------------------------------------------------------------|-------|-------------------------------------------------------------------------------|
| <i>PPR2</i>                                 | Maize                                                 | Chloroplast stroma (C)/ unknown                                                            | Required for the synthesis or assembly of chloroplast translation machinery                                                                                                    | Chloroplasts lack ribosomes, albino seedlings                                                                                            | 18    |                                                                               |
| <i>PPR4</i>                                 | Maize                                                 | Chloroplast stroma (C) /1 <sup>st</sup> intron of <i>rps12</i> pre-mRNA ( <i>in vivo</i> ) | Regulates <i>rps12</i> trans-splicing and chloroplast ribosome biogenesis                                                                                                      | Defective in <i>rps12</i> trans-splicing, albino seedlings lacking chloroplast ribosomes                                                 | 19    |                                                                               |
| <i>PPR531-11</i>                            | <i>Physcomitrella patens</i> (moss)                   | Chloroplast (P) / <i>clpP</i> (P)                                                          | Regulates intergenic cleavage between <i>clpP</i> and 5'- <i>rps12</i> mRNA and splicing of <i>clpP</i> mRNA                                                                   | Reduced levels of photosystem II reaction center protein D1 ( <i>clpP</i> ), abnormal chloroplast morphology                             | 20    |                                                                               |
| <i>PTAC2</i> ( <i>At1g74850</i> )           | <i>Arabidopsis</i>                                    | Chloroplast (C) /unknown                                                                   | Required for normal chloroplast encoded RNA polymerase-dependent transcription                                                                                                 | Reduction of chloroplast transcription, albino seedlings                                                                                 | 21    | Associated with chloroplast transcriptionally active complexes <i>in vivo</i> |
| <i>Tbc2</i>                                 | <i>Chlamydomonas reinhardtii</i> , (eukaryotic algae) | Chloroplast stroma (C) / <i>psbC</i> 5' UTR (P)                                            | Regulates translation of <i>psbC</i> mRNA as part of a protein complex                                                                                                         | Reduced levels of chlorophyll-binding photosystem II reaction center subunit P6 protein ( <i>psbC</i> ), reduced photosystem II activity | 22,23 |                                                                               |
| Plant CMS restorers                         |                                                       |                                                                                            |                                                                                                                                                                                |                                                                                                                                          |       |                                                                               |
| <i>Rf1a</i> , <i>PPR791</i> , <i>PPR8-1</i> | Rice                                                  | Mitochondria (P) / <i>B-atp6/orf79</i> ( <i>urf-rmc</i> ) (P)                              | Dominant restorer of BT-type CMS, reduces levels of aberrant CMS-associated protein, promotes endonucleolytic cleavage of <i>urf-rmc</i> RNA, role in <i>atp6</i> mRNA editing | Male sterility, accumulation of aberrant <i>urf-rmc</i> protein product                                                                  | 24-27 |                                                                               |
| <i>Rf1b</i>                                 | Rice                                                  | Mitochondria (P) / <i>B-atp6/orf79</i> ( <i>urf-rmc</i> ) (P)                              | Dominant restorer of BT-type CMS, reduces levels of aberrant CMS-associated protein, destabilizes <i>urf-rmc</i> mRNA                                                          | Male sterility, accumulation of aberrant <i>urf-rmc</i> protein product                                                                  | 24,25 |                                                                               |
| <i>Rfk1</i> , <i>ORF687</i>                 | Radish                                                | Mitochondria (P) / <i>orf125</i> (P)                                                       | Dominant Kosena-CMS restorer of fertility, decreases accumulation of CMS-associated protein ORF125 but does not decrease transcript levels                                     | Male sterility, accumulation of ORF125 protein product                                                                                   | 28    |                                                                               |
| <i>Rfo</i>                                  | Radish                                                | Mitochondria (P) / <i>orf138</i> (P)                                                       | Dominant Ogura ( <i>ogu</i> )-CMS restorer of fertility, decreases accumulation of CMS-associated protein ORF138 but does not decrease transcript levels                       | Male sterility, accumulation of ORF138 protein product                                                                                   | 29,30 |                                                                               |
| <i>Rf-PPR592</i>                            | Petunia                                               | Mitochondria (C) / <i>pcf</i> ( <i>in vivo</i> )                                           | Dominant CMS restorer of fertility, decreases accumulation of CMS-associated protein PCF                                                                                       | Male sterility (CMS), accumulation of CMS associated protein PCF                                                                         | 31,32 |                                                                               |
| Animals                                     |                                                       |                                                                                            |                                                                                                                                                                                |                                                                                                                                          |       |                                                                               |
| <i>BSF</i>                                  | <i>Drosophila melanogaster</i>                        | Cytoplasm (C) / <i>IV/V</i> RNA (3' UTR of bicoid ( <i>bcd</i> ) mRNA) ( <i>in vitro</i> ) | Regulates stability of <i>IV/V</i> RNA during oogenesis                                                                                                                        | Reduced levels of <i>IV/V</i> RNA                                                                                                        | 33    |                                                                               |

|                                  |                                                                                   |                                                                                          |                                                                                                     |                                                                                                                                            |       |                                                                                                                              |
|----------------------------------|-----------------------------------------------------------------------------------|------------------------------------------------------------------------------------------|-----------------------------------------------------------------------------------------------------|--------------------------------------------------------------------------------------------------------------------------------------------|-------|------------------------------------------------------------------------------------------------------------------------------|
| <i>LRPPRC</i> ,<br><i>LRP130</i> | Human                                                                             | Mitochondria (C), nucleus (C)<br><i>/coxI, coxIII</i> (P)                                | Regulates the stability/ translation of<br><i>coxI, coxIII</i> mRNAs                                | Leigh syndrome French Canadian, cytochrome<br><i>c</i> oxidase deficiency                                                                  | 34-37 | Associated with<br>nuclear and mitochond-<br>rial RNA <i>in vivo</i> , has<br>nucleotide-binding<br>activity <i>in vitro</i> |
| Protists                         |                                                                                   |                                                                                          |                                                                                                     |                                                                                                                                            |       |                                                                                                                              |
| <i>TbPPR1</i> -<br><i>TbPPR8</i> | <i>Trypanosoma<br/>brucei</i> (protist<br>causes African<br>Sleeping<br>Sickness) | TBPPR1-7: Mitochondria (C)<br>TBbPPR8: Cytosol (C)<br><i>/TbPPR5: 12S rRNA (in vivo)</i> | TbPPR2-7 involved in mitochondrial<br>ribosome assembly/function                                    | Defects in oxidative phosphorylation and<br>growth in glucose medium,<br><i>TbPPR2-7</i> mutants have reduced mitochondrial<br>rRNA levels | 38    |                                                                                                                              |
| Fungi                            |                                                                                   |                                                                                          |                                                                                                     |                                                                                                                                            |       |                                                                                                                              |
| <i>Cya-5</i>                     | <i>Neurospora<br/>crassa</i>                                                      | Mitochondria (P)<br><i>/coxI</i> (P)                                                     | Required for the stabilization/transla-<br>tion <i>coxI</i> mRNA                                    | Reduced cytochrome <i>c</i> oxidase activity                                                                                               | 39    |                                                                                                                              |
| <i>PET309</i>                    | <i>Saccharomyces<br/>cerevisiae</i>                                               | Mitochondrial inner membrane (C)<br><i>/coxI</i> 5' UTR(P)                               | Required for the normal processing/<br>stabilization of <i>coxI</i> pre mRNA and its<br>translation | Reduced cytochrome <i>c</i> oxidase activity, reduced<br>levels of mature <i>coxI</i> mRNA and COXI protein                                | 40,41 |                                                                                                                              |

References

1. Fisk, D. G., Walker, M. B. & Barkan, A. Molecular cloning of the maize gene *crp1* reveals similarity between regulators of mitochondrial and chloroplast gene expression. *EMBO J.* **18**, 2621-2630 (1999).
2. Barkan, A., Walker, M., Nolasco, M. & Johnson, D. A nuclear mutation in maize blocks the processing and translation of several chloroplast mRNAs and provides evidence for the differential translation of alternative mRNA forms. *EMBO J.* **13**, 3170-3181 (1994).
3. Schmitz-Linneweber, C., Williams-Carrier, R. & Barkan, A. RNA immunoprecipitation and microarray analysis show a chloroplast Pentatricopeptide repeat protein to be associated with the 5' region of mRNAs whose translation it activates. *Plant Cell* **17**, 2791-2804 (2005).
4. Hashimoto, M., Endo, T., Peltier, G., Tasaka, M. & Shikanai, T. A nucleus-encoded factor, CRR2, is essential for the expression of chloroplast *ndhB* in Arabidopsis. *Plant J.* **36**, 541-549 (2003).
5. Okuda, K., Nakamura, T., Sugita, M., Shimizu, T. & Shikanai, T. A pentatricopeptide repeat protein is a site recognition factor in chloroplast RNA editing. *J. Biol. Chem.* **281**, 37661-37667 (2006).
6. Kotera, E., Tasaka, M. & Shikanai, T. A pentatricopeptide repeat protein is essential for RNA editing in chloroplasts. *Nature* **433**, 326-330 (2005).
7. Gutierrez-Marcos, J. F. *et al.* empty pericarp4 encodes a mitochondrion-targeted pentatricopeptide repeat protein necessary for seed development and plant growth in maize. *Plant Cell* **19**, 196-210 (2007).
8. Ding, Y. H., Liu, N. Y., Tang, Z. S., Liu, J. & Yang, W. C. Arabidopsis GLUTAMINE-RICH PROTEIN23 is essential for early embryogenesis and encodes a novel nuclear PPR motif protein that interacts with RNA polymerase II subunit III. *Plant Cell* **18**, 815-830 (2006).
9. Koussevitzky, S. *et al.* Signals from chloroplasts converge to regulate nuclear gene expression. *Science* **316**, 715-719 (2007).
10. Meierhoff, K., Felder, S., Nakamura, T., Bechtold, N. & Schuster, G. HCF152, an Arabidopsis RNA binding pentatricopeptide repeat protein involved in the processing of chloroplast *psbB-psbT-psbH-petB-petD* RNAs. *Plant Cell* **15**, 1480-1495 (2003).
11. Felder, S. *et al.* The nucleus-encoded HCF107 gene of Arabidopsis provides a link between intercistronic RNA processing and the accumulation of translation-competent *psbH* transcripts in chloroplasts. *Plant Cell* **13**, 2127-2141 (2001).
12. Nakamura, T., Meierhoff, K., Westhoff, P. & Schuster, G. RNA-binding properties of HCF152, an Arabidopsis PPR protein involved in the processing of chloroplast RNA. *Eur. J. Biochem.* **270**, 4070-4081 (2003).
13. Kobayashi, K. *et al.* Lovastatin insensitive 1, a Novel pentatricopeptide repeat protein, is a potential regulatory factor of isoprenoid biosynthesis in Arabidopsis. *Plant Cell Physiol.* **48**, 322-331 (2007).

14. Lown, F. J., Watson, A. T. & Purton, S. Chlamydomonas nuclear mutants that fail to assemble respiratory or photosynthetic electron transfer complexes. *Biochem. Soc. Trans.* **29**, 452-455 (2001).
15. Raynaud, C. *et al.* Evidence for regulatory function of nucleus-encoded factors on mRNA stabilization and translation in the chloroplast. *Proc Natl Acad Sci U S A* **104**, 9093-9098 (2007).
16. de Longevialle, A. F. *et al.* The pentatricopeptide repeat gene OTP43 is required for trans-splicing of the mitochondrial nad1 Intron 1 in Arabidopsis thaliana. *Plant Cell* **19**, 3256-3265 (2007).
17. Yamazaki, H., Tasaka, M. & Shikanai, T. PPR motifs of the nucleus-encoded factor, PGR3, function in the selective and distinct steps of chloroplast gene expression in Arabidopsis. *Plant J.* **38**, 152-163 (2004).
18. Williams, P. M. & Barkan, A. A chloroplast-localized PPR protein required for plastid ribosome accumulation. *Plant J.* **36**, 675-686 (2003).
19. Schmitz-Linneweber, C. *et al.* A pentatricopeptide repeat protein facilitates the trans-splicing of the maize chloroplast rps12 pre-mRNA. *Plant Cell* **18**, 2650-2663 (2006).
20. Hattori, M., Miyake, H. & Sugita, M. A Pentatricopeptide repeat protein is required for RNA processing of clpP Pre-mRNA in moss chloroplasts. *J. Biol. Chem.* **282**, 10773-10782 (2007).
21. Pfalz, J., Liere, K., Kandlbinder, A., Dietz, K. J. & Oelmüller, R. pTAC2, -6, and -12 are components of the transcriptionally active plastid chromosome that are required for plastid gene expression. *Plant Cell* **18**, 176-197 (2006).
22. Zerges, W., Auchincloss, A. H. & Rochaix, J. D. Multiple translational control sequences in the 5' leader of the chloroplast psbC mRNA interact with nuclear gene products in Chlamydomonas reinhardtii. *Genetics* **163**, 895-904 (2003).
23. Auchincloss, A. H., Zerges, W., Perron, K., Girard-Bascou, J. & Rochaix, J. D. Characterization of Tbc2, a nucleus-encoded factor specifically required for translation of the chloroplast psbC mRNA in Chlamydomonas reinhardtii. *J. Cell Biol.* **157**, 953-962 (2002).
24. Wang, Z. *et al.* Cytoplasmic male sterility of rice with boro II cytoplasm is caused by a cytotoxic peptide and is restored by two related PPR motif genes via distinct modes of mRNA silencing. *Plant Cell* **18**, 676-687 (2006).
25. Akagi, H. *et al.* Positional cloning of the rice Rf-1 gene, a restorer of BT-type cytoplasmic male sterility that encodes a mitochondria-targeting PPR protein. *Theor. Appl. Genet.* **108**, 1449-1457 (2004).
26. Komori, T. *et al.* Map-based cloning of a fertility restorer gene, Rf-1, in rice (Oryza sativa L.). *Plant J.* **37**, 315-325 (2004).
27. Kazama, T. & Toriyama, K. A pentatricopeptide repeat-containing gene that promotes the processing of aberrant atp6 RNA of cytoplasmic male-sterile rice. *FEBS Lett.* **544**, 99-102 (2003).
28. Koizuka, N. *et al.* Genetic characterization of a pentatricopeptide repeat protein gene, orf687, that restores fertility in the cytoplasmic male-sterile Kosena radish. *Plant J.* **34**, 407-415 (2003).
29. Brown, G. G. *et al.* The radish Rfo restorer gene of Ogura cytoplasmic male sterility encodes a protein with multiple pentatricopeptide repeats. *Plant J.* **35**, 262-272 (2003).
30. Desloire, S. *et al.* Identification of the fertility restoration locus, Rfo, in radish, as a member of the pentatricopeptide-repeat protein family. *EMBO Rep.* **4**, 588-594 (2003).
31. Gillman, J. D., Bentolila, S. & Hanson, M. R. The petunia restorer of fertility protein is part of a large mitochondrial complex that interacts with transcripts of the CMS-associated locus. *Plant J.* **49**, 217-227 (2007).
32. Bentolila, S., Alfonso, A. A. & Hanson, M. R. A pentatricopeptide repeat-containing gene restores fertility to cytoplasmic male-sterile plants. *Proc Natl Acad Sci U S A* **99**, 10887-10892 (2002).
33. Mancebo, R., Zhou, X., Shillinglaw, W., Henzel, W. & Macdonald, P. M. BSF binds specifically to the bicoid mRNA 3' untranslated region and contributes to stabilization of bicoid mRNA. *Mol. Cell Biol.* **21**, 3462-3471 (2001).
34. Xu, F., Morin, C., Mitchell, G., Ackerley, C. & Robinson, B. H. The role of the LRPPRC (leucine-rich pentatricopeptide repeat cassette) gene in cytochrome oxidase assembly: mutation causes lowered levels of COX (cytochrome c oxidase) I and COX III mRNA. *Biochem. J.* **382**, 331-336 (2004).
35. Mootha, V. K. *et al.* Identification of a gene causing human cytochrome c oxidase deficiency by integrative genomics. *Proc. Natl. Acad. Sci. USA* **100**, 605-610 (2003).
36. Mili, S. & Pinol-Roma, S. LRP130, a pentatricopeptide motif protein with a noncanonical RNA-binding domain, is bound in vivo to mitochondrial and nuclear RNAs. *Mol Cell Biol* **23**, 4972-4982 (2003).
37. Mili, S., Shu, H. J., Zhao, Y. & Pinol-Roma, S. Distinct RNP complexes of shuttling hnRNP proteins with pre-mRNA and mRNA: candidate intermediates in formation and export of mRNA. *Mol. Cell Biol.* **21**, 7307-7319 (2001).
38. Pusnik, M., Small, I., Read, L. K., Fabbro, T. & Schneider, A. Pentatricopeptide Repeat Proteins in Trypanosoma brucei Function in Mitochondrial Ribosomes. *Mol. Cell Biol.* **27**, 6876-6888 (2007).

39. Coffin, J. W., Dhillon, R., Ritzel, R. G. & Nargang, F. E. The *Neurospora crassa* *cya-5* nuclear gene encodes a protein with a region of homology to the *Saccharomyces cerevisiae* PET309 protein and is required in a post-transcriptional step for the expression of the mitochondrially encoded COXI protein. *Curr. Genet.* **32**, 273-280 (1997).
40. Manthey, G. M., Przybyla-Zawislak, B. D. & McEwen, J. E. The *Saccharomyces cerevisiae* Pet309 protein is embedded in the mitochondrial inner membrane. *Eur. J. Biochem.* **255**, 156-161 (1998).
41. Manthey, G. M. & McEwen, J. E. The product of the nuclear gene PET309 is required for translation of mature mRNA and stability or production of intron-containing RNAs derived from the mitochondrial COX1 locus of *Saccharomyces cerevisiae*. *EMBO J.* **14**, 4031-4043 (1995).
